# Supplementary material
Source: PubMed Central journal article supplement (PMC6728561)
Supplement: DS_10.1177_0022034518805978.pdf [file DS_10.1177_0022034518805978.pdf]

# Genome Editing: A New Horizon for Oral and Craniofacial Research

N. Yu, J. Yang, Y. Mishina, and W.V. Giannobile

## Appendix

**Appendix Table. Applications of CRISPR/Cas9 in Oral and Craniofacial Field**

| <b>Gene</b>        | <b>Function</b>                                 | <b>Application</b>                  | <b>References</b>    |
|--------------------|-------------------------------------------------|-------------------------------------|----------------------|
| <i>ACVR1B</i>      | Cancer                                          | Knock-out in OSC-19 cell line       | Loomans et al., 2017 |
| <i>FN</i>          | Cancer                                          | Knock-out in SACC-83 cell line      | Wang et al., 2015    |
| <i>FN</i>          | Cancer                                          | Knock-out in CNE-2Z cell line       | Lv et al., 2017      |
| <i>hTERT</i>       | Cancer                                          | Knock-out in SCC-15 cell line       | Wu et al., 2017      |
| <i>KRT17</i>       | Cancer                                          | Knock-out in cell line              | Khanom et al., 2016  |
| <i>LDB1</i>        | Cancer                                          | Knock-out in VU-SCC-1729 cell       | Simonik et al., 2016 |
| <i>MUL1</i>        | Cancer                                          | Knock-out in FaDu cell line         | Kim et al., 2018     |
| <i>p75(NTR)</i>    | Cancer                                          | Knock-out in SCC-9 cell line        | Huang et al., 2017   |
| <i>Golgb1</i>      | Palatal development                             | Indel in mouse model                | Lan et al., 2016     |
| <i>Itga8</i>       | Facial development                              | Indel in zebrafish                  | Talbot et al., 2016  |
| <i>kif5B</i>       | Craniofacial skeleton morphogenesis             | Indel in zebrafish                  | Santos-Ledo., 2017   |
| <i>Lrp5</i>        | Craniofacial skeleton morphogenesis             | Knock-out in zebrafish              | Willems et al., 2015 |
| <i>msx1</i>        | Tooth and palatal development                   | Indel in mouse model                | Mitsui et al., 2016  |
| <i>MSX1</i>        | Tooth and palatal development                   | Indel in human embryonic stem cells | Xue et al., 2017     |
| <i>Pax9</i>        | Development of craniofacial mesenchymal tissues | Indel in mouse model                | Feng et al., 2016    |
| <i>smchd1</i>      | Craniofacial skeleton morphogenesis             | Indel in zebrafish                  | Shaw et al., 2017    |
| Wnt pathways genes | Palatal development                             | Indel in zebrafish                  | Rochard et al., 2016 |
| <i>PTPN2</i>       | Periodontal disease                             | Knock-out in OKF6 keratinocytes     | Zhang et al., 2018   |

## Appendix References

- Khanom R, Nguyen CT, Kayamori K, Zhao X, Morita K, Miki Y, Katsube K, Yamaguchi A, Sakamoto K. 2016. Keratin 17 is induced in oral cancer and facilitates tumor growth. *PloS One*. 11(8):e0161163.
- Loomans HA, Arnold SA, Hebron K, Taylor CJ, Zijlstra A, Andl CD. 2017. Loss of ACVRIB leads to increased squamous cell carcinoma aggressiveness through alterations in cell-cell and cell-matrix adhesion proteins. *Am J Cancer Res*. 7(12):2422–2437.
- Lv WQ, Wang HC, Peng J, Wang YX, Jiang JH, Li CY. 2017. Gene editing of the extra domain A positive fibronectin in various tumors, amplified the effects of CRISPR/Cas system on the inhibition of tumor progression. *Oncotarget*. 8(62):105020–105036.
- Rochard L, Monica SD, Ling IT, Kong Y, Roberson S, Harland R, Halpern M, Liao EC. 2016. Roles of Wnt pathway genes *wls*, *wnt9a*, *wnt5b*, *frzb* and *gpc4* in regulating convergent-extension during zebrafish palate morphogenesis. *Development*. 143(14):2541–2547.
- Talbot JC, Nichols JT, Yan YL, Leonard IF, BreMiller RA, Amacher SL, Postlethwait JH, Kimmel CB. 2016. Pharyngeal morphogenesis requires *Fras1-Itga8*-dependent epithelial-mesenchymal interaction. *Dev Biol*. 416(1):136–148.
- Wu Y, Bian C, Zhen C, Liu L, Lin Z, Nisar MF, Wang M, Bartsch JW, Huang E, Ji P, et al. 2017. Telomerase reverse transcriptase mediates emt through NF-kappaB signaling in tongue squamous cell carcinoma. *Oncotarget*. 8(49):85492–85503.
- Zhang P, Zhang W, Zhang D, Wang M, Aprecio R, Ji N, Mohamed O, Li Y, Ding Y, Wang Q. 2018. 25-Hydroxyvitamin D3-enhanced PTPN2 positively regulates periodontal inflammation through the JAK/STAT pathway in human oral keratinocytes and a mouse model of type 2 diabetes mellitus. *J Periodontal Res*. 53(3):467–477.
